# Supplementary material
Source: Springer Nature journal article supplement (https://www.springerprofessional.de/resource/supplementary/13173_2013_12_MOESM2_ESM.pdf/11897014)
Supplement: MOESM2 [file 11897014]

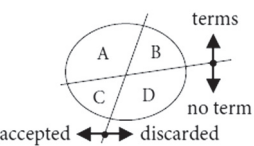

$$\textit{precision} = \frac{A}{A + C}$$

$$\textit{noise} = \frac{C}{A + C}$$

$$\textit{recall} = \frac{A}{A + B}$$

$$\textit{silence} = \frac{B}{A + B}$$

$$\textit{accuracy} = \frac{A + D}{A + B + C + D}$$
